# Supplementary material
Source: PubMed Central journal article supplement (PMC547841)
Supplement: pnas_102_5_1679__3.pdf [file pnas_102_5_1679__3.pdf]

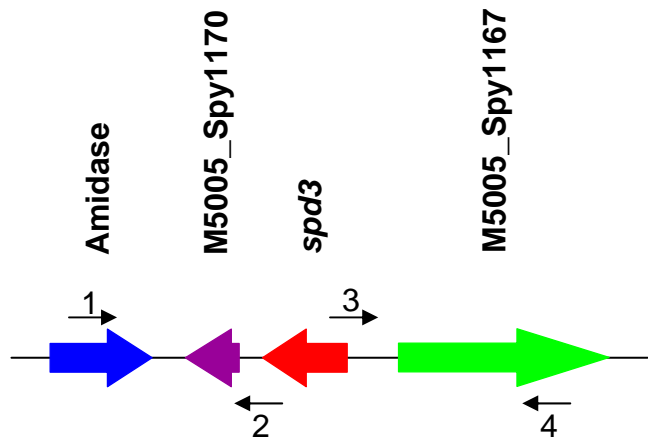

Clone PCR 1 + 2

Clone PCR 3 + 4

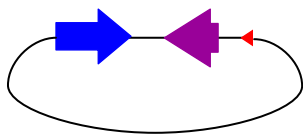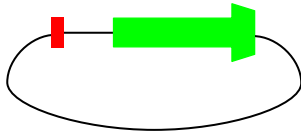

Insert Kn cassette

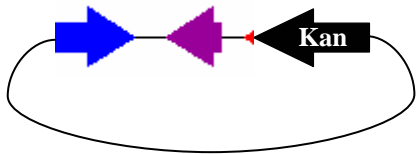

Clone inserts together

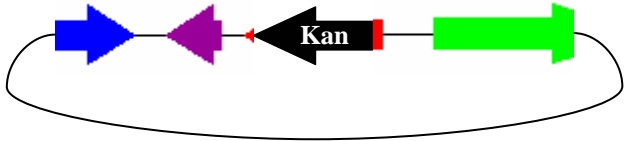

Digest construct, gel extract insert, and transform GAS
