# Supplementary material
Source: PubMed Central journal article supplement (PMC547841)

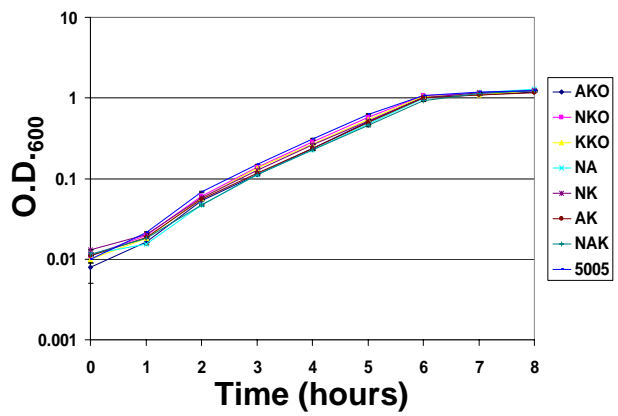

Supplement: pnas_102_5_1679__4.pdf [file pnas_102_5_1679__4.pdf]

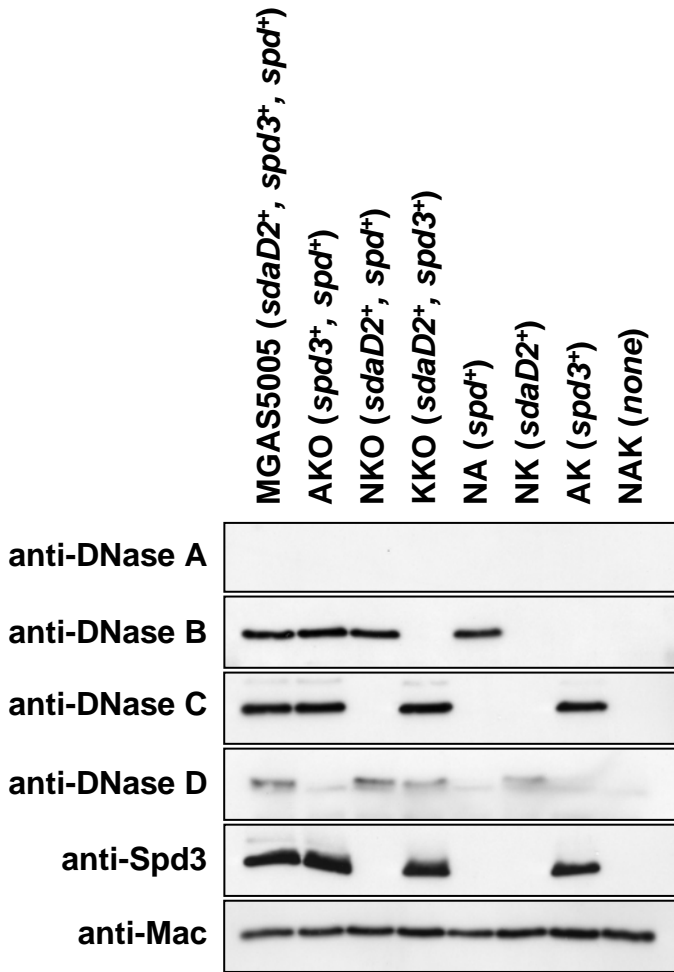

Supplement: pnas_102_5_1679__5.pdf [file pnas_102_5_1679__5.pdf]

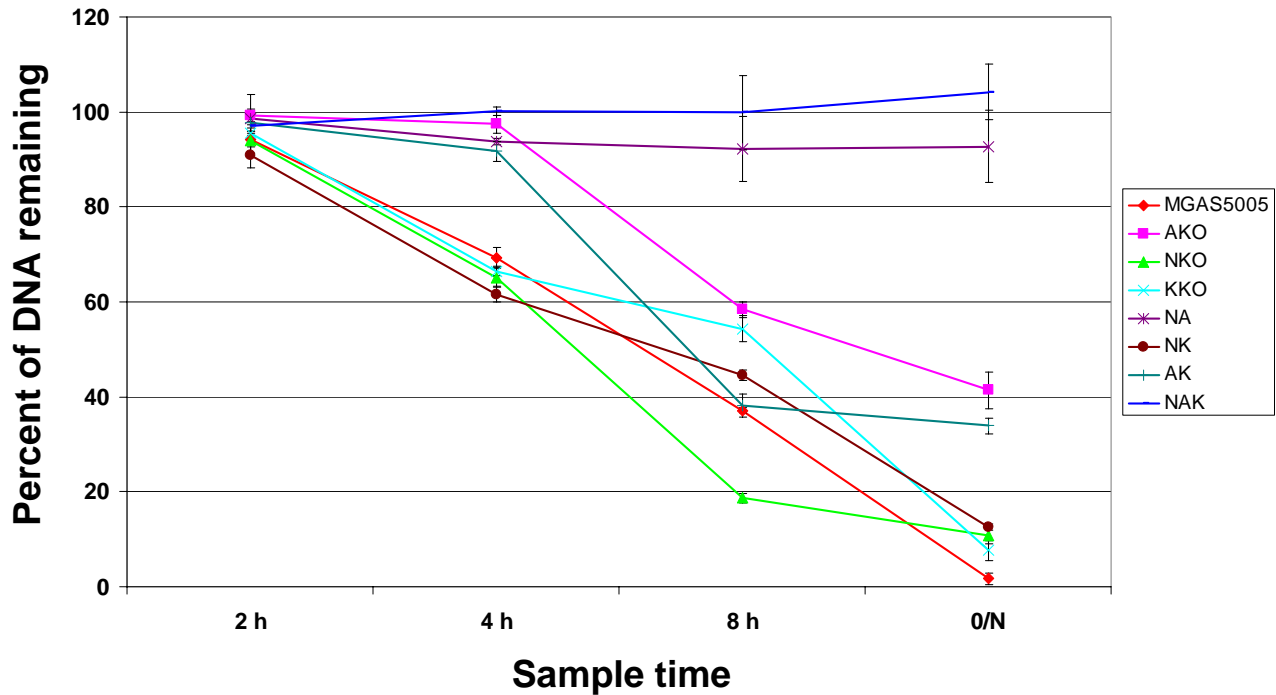

Supplement: pnas_102_5_1679__6.pdf [file pnas_102_5_1679__6.pdf]

**A**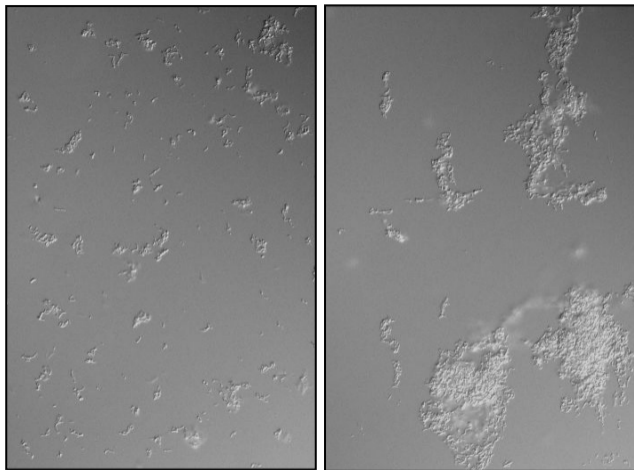

**MGAS5005  
(wild-type)**

**NAK  
(triple mutant)**

**B**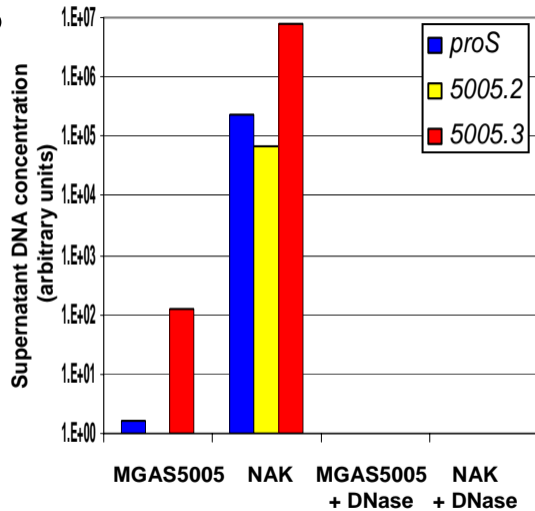

Supplement: pnas_102_5_1679__7.pdf [file pnas_102_5_1679__7.pdf]

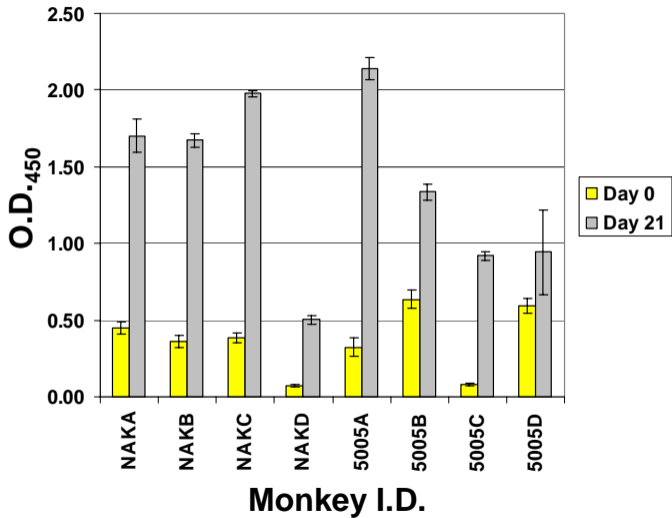

Supplement: pnas_102_5_1679__8.pdf [file pnas_102_5_1679__8.pdf]
